# Supplementary material for: Use of Cardiac Biomarkers for Monitoring Improvement of Left Ventricular Function by Immunoadsorption Treatment in Dilated Cardiomyopathy
Source: MDPI journal article supplement (doi:10.3390/biom9110654), 2019-10-25

Supplementary Materials

# Use of Cardiac Biomarkers for Monitoring Improvement of Left Ventricular Function by Immunoabsorption Treatment in Dilated Cardiomyopathy

Karolina Weinmann, Jakob Werner, Wolfgang Koenig, Wolfgang Rottbauer, Daniel Walcher and Mirjam Kessler \*

Department of Internal Medicine II, University Ulm Medical Center, Ulm, Germany

\* Correspondence: mirjam.kessler@uniklinik-ulm.de; Tel.: +49 731 500 45064; Fax: +49 731 500 45005

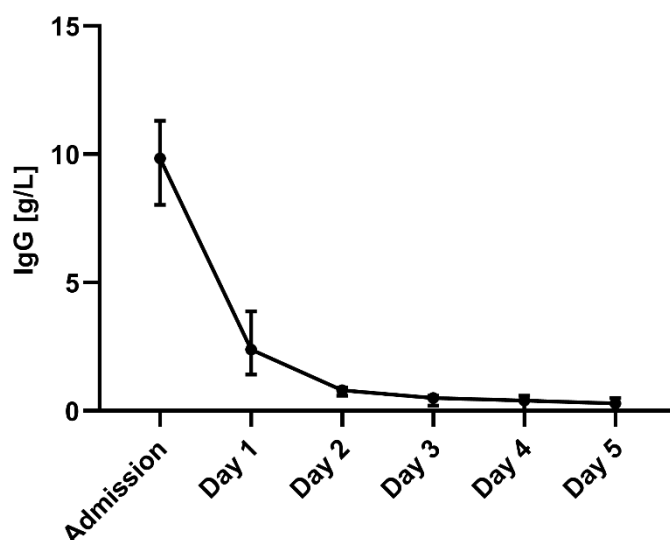

**Figure S1.** Drop of circulating IgG levels during immunoabsorption treatment.

Table S1. Heart failure medication.

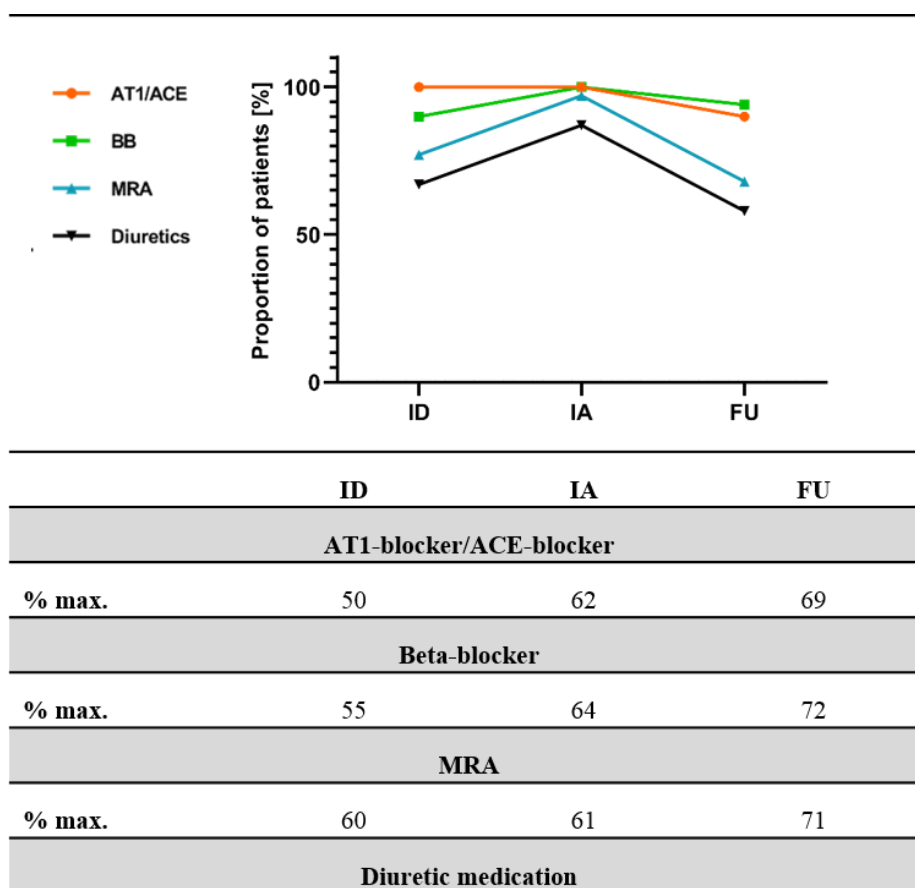

Graphs display the mean percentage of patients that received the respective medication, AT1/ACE = AT1/ACE-blocker, BB = Beta-blocker MRA = mineralocorticoid receptor antagonist, ID = initial diagnosis, IA = before immunoadsorption treatment, FU = long-term follow-up, % max. = mean % of maximum equivalent dosage.

Table S2. Correlation of  $\Delta$  HF biomarker with comorbidities.

|                             | $\Delta$ sST2          | $\Delta$ NT-proBNP     | $\Delta$ hs troponin T | $\Delta$ hs troponin I |
|-----------------------------|------------------------|------------------------|------------------------|------------------------|
| <b>Creatinine before IA</b> | $r = -0.01$ $p = 0.98$ | $r = -0.04$ $p = 0.8$  | $r = 0.04$ $p = 0.8$   | $r = -0.1$ $p = 0.6$   |
| <b>Creatinine at FU</b>     | $r = -0.1$ $p = 0.6$   | $r = -0.1$ $p = 0.6$   | $r = 0.1$ $p = 0.7$    | $r = -0.05$ $p = 0.8$  |
| <b>Hb before IA</b>         | $r = 0.02$ $p = 0.92$  | $r = 0.3$ $p = 0.08$   | $r = -0.02$ $p = 0.9$  | $r = -0.05$ $p = 0.8$  |
| <b>Hb at FU</b>             | $r = 0.02$ $p = 0.9$   | $r = -0.1$ $p = 0.6$   | $r = -0.1$ $p = 0.5$   | $r = -0.04$ $p = 0.8$  |
| <b>BMI before IA</b>        | $r = -0.09$ $p = 0.6$  | $r = 0.1$ $p = 0.6$    | $r = -0.04$ $p = 0.8$  | $r = -0.2$ $p = 0.4$   |
| <b>BMI at FU</b>            | $r = -0.07$ $p = 0.7$  | $r = 0.3$ $p = 0.2$    | $r = -0.2$ $p = 0.4$   | $r = -0.2$ $p = 0.4$   |
| <b>Age before IA</b>        | $r = -0.18$ $p = 0.3$  | $r = -0.01$ $p = 0.96$ | $r = 0.1$ $p = 0.6$    | $r = -0.1$ $p = 0.6$   |

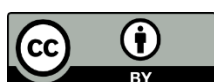

Supplement: s1 [file s1]
